# Supplementary material
Source: PubMed Central journal article supplement (PMC4064720)
Supplement: NIHMS525527-supplement-1.pdf [file NIHMS525527-supplement-1.pdf]

## **Supplementary Information**

### **Differential LINE-1 retrotransposition in pluripotent stem cells between humans and other great apes**

Maria C. N. Marchetto\*, Iñigo Narvaiza\*, Ahmet M. Denli, Christopher Benner, Thomas A. Lazzarini, Jason L. Nathanson, Apua C. M. Paquola, Keval N. Desai, Roberto H. Herai, Matthew D. Weitzman, Gene W. Yeo, Alysson R. Muotri, Fred H. Gage<sup>¶</sup>

#### **Inventory of Supplementary Information:**

**Supplementary Table 1:** MicroRNAs detected in human iPSCs by small RNA-seq (Excel file).

**Supplementary Table 2:** Annotated piRNAs detected in human iPSCs by small RNA-seq (Excel file).
